# Supplementary material for: Efficiency to Discovery Transgenic Loci in GM Rice Using Next Generation Sequencing Whole Genome Re-sequencing
Source: PubMed Central journal article supplement — Genomics Inform. 2015 Sep 30;13(3):81–5. doi: 10.5808/GI.2015.13.3.81 (PMC4623445; doi:10.5808/gi.2015.13.3.81), 2015-09-30
Supplement: gni-13-81-s001.pdf [file gni-13-81-s001.pdf]

## SUPPLEMENTARY INFORMATION

### Efficiency to Discovery Transgenic Loci in GM Rice Using Next Generation Sequencing Whole Genome Re-sequencing

**Doori Park<sup>1</sup>, Dongin Kim<sup>2</sup>, Green Jang<sup>2</sup>, Jongsung Lim<sup>2</sup>, Yun-Ji Shin<sup>3</sup>, Jina Kim<sup>3</sup>,  
Mi-Seong Seo<sup>3</sup>, Su-Hyun Park<sup>4</sup>, Ju-Kon Kim<sup>4</sup>, Tae-Ho Kwon<sup>3\*</sup>, Ik-Young Choi<sup>1\*\*</sup>**

<sup>1</sup>Institute of Green Bio Science and Technology, Seoul National University, Pyeongchang 25354, Korea,

<sup>2</sup>National Instrumentation Center for Environmental Management, College of Agriculture and Life Sciences,  
Seoul National University, Seoul 08826, Korea,

<sup>3</sup>Natural Bio-Materials Inc., Wanju 55322, Korea,

<sup>4</sup>Crop Biotech Institute, Green-Bio Science and Technology, Seoul National University, Pyeongchang 25354,  
Korea

※ pJKS131 vector sequence

1060-2085 : HPTII

2376-2401 : LB T-DNA

8634-8661 : RB T-DNA

8907-9938 : RAmy3D promoter

9945-9965 : Hwang`s 5`UTR

9966-10040 : RAmy3D signal peptide

10041-10204 : EGF mature peptide

10211-10519 : RAmy3D 3`UTR

```
      10      20      30      40      50      60
GTAATCATGG TCATAGCTGT TTCCTGTGTG AAATTGTTAT CCGCTCACAA TTCCACACAA

      70      80      90     100     110     120
CATACGAGCC GGAAGCATAA AGTGTAAGC CTGGGGTGCC TAATGAGTGA GCTAACTCAC

     130     140     150     160     170     180
ATTAATTGCG TTGCGCTCAC TGCCCGCTTT CCAGTCGGGA AACCTGTCGT GCCAGCTGCA

     190     200     210     220     230     240
TTAATGAATC GGCCAACGCG CGGGGAGAGG CGGTTTGCGT ATTGGCTAGA GCAGCTTGCC

     250     260     270     280     290     300
AACATGGTGG AGCACGACAC TCTCGTCTAC TCCAAGAATA TCAAAGATAC AGTCTCAGAA

     310     320     330     340     350     360
GACCAAAGGG CTATTGAGAC TTTTCAACAA AGGGTAATAT CGGGAAACCT CCTCGGATTC

     370     380     390     400     410     420
CATTGCCCAG CTATCTGTCA CTTTCATCAA AGGACAGTAG AAAAGGAAGG TGGCACCTAC

     430     440     450     460     470     480
AAATGCCATC ATTGCGATAA AGGAAAGGCT ATCGTTCAAG ATGCCTCTGC CGACAGTGGT

     490     500     510     520     530     540
CCCAAAGATG GACCCCCACC CACGAGGAGC ATCGTGGAAA AAGAAGACGT TCCAACCACG

     550     560     570     580     590     600
TCTTCAAAGC AAGTGGATTG ATGTGATAAC ATGGTGGAGC ACGACACTCT CGTCTACTCC

     610     620     630     640     650     660
AAGAATATCA AAGATACAGT CTCAGAAGAC CAAAGGGCTA TTGAGACTTT TCAACAAAGG

     670     680     690     700     710     720
GTAATATCGG GAAACCTCCT CGGATTCCAT TGCCAGCTA TCTGTCACTT CATCAAAGG

     730     740     750     760     770     780
ACAGTAGAAA AGGAAGGTGG CACCTACAAA TGCCATCATT GCGATAAAGG AAAGGCTATC
```

790 800 810 820 830 840  
GTTCAAGATG CCTCTGCCGA CAGTGGTCCC AAAGATGGAC CCCCACCCAC GAGGAGCATC

850 860 870 880 890 900  
GTGGAAAAAG AAGACGTTCC AACCACGTCT TCAAAGCAAG TGGATTGATG TGATATCTCC

910 920 930 940 950 960  
ACTGACGTAA GGGATGACGC ACAATCCAC TATCCTTCGC AAGACCTTCC TCTATATAAG

970 980 990 1000 1010 1020  
GAAGTTCATT TCATTTGGAG AGGACACGCT GAAATCACCA GTCTCTCTCT ACAAATCTAT

1030 1040 1050 1060 1070 1080  
CTCTCTCGAG CTTTCGAGAG TCCCGGGGG CAATGAGATA TGAAAAAGCC TGAACTCACC

1090 1100 1110 1120 1130 1140  
GCGACGTCTG TCGAGAAGTT TCTGATCGAA AAGTTCGACA GCGTCTCCGA CCTGATGCAG

1150 1160 1170 1180 1190 1200  
CTCTCGGAGG GCGAAGAATC TCGTGCTTTC AGCTTCGATG TAGGAGGGCG TGGATATGTC

1210 1220 1230 1240 1250 1260  
CTGCGGTAA ATAGCTGCGC CGATGGTTTC TACAAAGATC GTTATGTTTA TCGGCACTTT

1270 1280 1290 1300 1310 1320  
GCATCGGCCG CGCTCCCGAT TCCGGAAGTG CTTGACATTG GGGAGTTTAG CGAGAGCCTG

1330 1340 1350 1360 1370 1380  
ACCTATTGCA TCTCCCGCCG TGCACAGGGT GTCACGTTGC AAGACCTGCC TGAAACCGAA

1390 1400 1410 1420 1430 1440  
CTGCCCGCTG TTCTACAACC GGTCGCGGAG GCTATGGATG CGATCGCTGC GGCCGATCTT

1450 1460 1470 1480 1490 1500  
AGCCAGACGA GCGGGTTCGG CCCATTCCGA CCGCAAGGAA TCGGTCAATA CACTACATGG

1510 1520 1530 1540 1550 1560  
CGTGATTTCA TATGCGCGAT TGCTGATCCC CATGTGTATC ACTGGCAAAC TGTGATGGAC

1570 1580 1590 1600 1610 1620  
GACACCGTCA GTGCGTCCGT CGCGCAGGCT CTCGATGAGC TGATGCTTTG GGCCGAGGAC

1630 1640 1650 1660 1670 1680  
TGCCCCGAAG TCCGGCACCT CGTGCACGCG GATTTCGGCT CCAACAATGT CCTGACGGAC

1690 1700 1710 1720 1730 1740  
AATGGCCGCA TAACAGCGGT CATTGACTGG AGCGAGGCGA TGTTCCGGGA TTCCAATAC

1750 1760 1770 1780 1790 1800  
GAGGTCGCCA ACATCTTCTT CTGGAGGCCG TGGTTGGCTT GTATGGAGCA GCAGACGGCG

1810 1820 1830 1840 1850 1860  
TACTTCGAGC GGAGGCATCC GGAGCTTGCA GGATCGCCAC GACTCCGGGC GTATATGCTC

1870 1880 1890 1900 1910 1920  
CGCATTGGTC TTGACCAACT CTATCAGAGC TTGGTTGACG GCAATTTTCA TGATGCAGCT

1930 1940 1950 1960 1970 1980  
TGGGGCGAGG GTCGATGCCA CGCAATCGTC CGATCCGGAG CCGGGACTGT CGGGCGTACA

1990 2000 2010 2020 2030 2040  
CAAATCGCCC GCAGAAGCGC GGCCGTCTGG ACCGATGGCT GTGTAGAAGT ACTCGCCGAT

2050 2060 2070 2080 2090 2100  
AGTGAAAACC GACGCCCCAG CACTCGTCCG AGGGCAAAGA AATAGAGTAG ATGCCGACCG

2110 2120 2130 2140 2150 2160  
GATCTGTCGA TCGACAAGCT CGAGTTTCTC CATAATAATG TGTGAGTAGT TCCCAGATAA

2170 2180 2190 2200 2210 2220  
GGGAATTAGG GTTCCTATAG GGTTTCGCTC ATGTGTTGAG CATATAAGAA ACCCTTAGTA

2230 2240 2250 2260 2270 2280  
TGTATTTGTA TTTGTAAAAT ACTTCTATCA ATAAAATTC TAATTCCTAA AACCAAAATC

2290 2300 2310 2320 2330 2340  
CAGTACTAAA ATCCAGATCC CCCGAATTAA TTCGGCGTTA ATTCAGTACA TTAAAAAGT

2350 2360 2370 2380 2390 2400  
CCGCAATGTG TTATTAAGTT GTCTAAGCGT CAATTTGTTT ACACCACAAT ATATCCTGCC

2410 2420 2430 2440 2450 2460  
ACCAGCCAGC CAACAGCTCC CCGACCGGCA GCTCGGCACA AAATCACCAC TCGATACAGG

2470 2480 2490 2500 2510 2520  
CAGCCCATCA GTCCGGGACG GCGTCAGCGG GAGAGCCGTT GTAAGCGGC AGACTTTGCT

2530 2540 2550 2560 2570 2580  
CATGTTACCG ATGCTATTCT GAAGAACGGC AACTAAGCTG CCGGGTTTGA AACACGGATG

2590 2600 2610 2620 2630 2640  
ATCTCGGGGA GGGTAGCATG TTGATTGTAA CGATGACAGA GCGTTGCTGC CTGTGATCAC

2650 2660 2670 2680 2690 2700  
CGCGGTTTCA AAATCGGCTC CGTCGATACT ATGTTATACG CCAACTTTGA AAACAACTTT

2710 2720 2730 2740 2750 2760  
GAAAAAGCTG TTTTCTGGTA TTTAAGGTTT TAGAATGCAA GGAACAGTGA ATTGGAGTTC

2770 2780 2790 2800 2810 2820  
GTCTTGTTAT AATTAGCTTC TTGGGGTATC TTTAAATACT GTAGAAAAGA GGAAGGAAAT

2830 2840 2850 2860 2870 2880  
AATAAATGGC TAAAATGAGA ATATCACCGG AATTGAAAAA ACTGATCGAA AAATACCGCT

2890 2900 2910 2920 2930 2940  
GCGTAAAAGA TACGGAAGGA ATGTCTCCTG CTAAGGTATA TAAGCTGGTG GGAGAAAATG

2950 2960 2970 2980 2990 3000  
AAAACCTATA TTTAAAAATG ACGGACAGCC GGTATAAAGG GACCACCTAT GATGTGGAAC

3010 3020 3030 3040 3050 3060  
GGGAAAAGGA CATGATGCTA TGGCTGGAAG GAAAGCTGCC TGTTCCAAAG GTCCTGCACT

3070 3080 3090 3100 3110 3120  
TTGAACGGCA TGATGGCTGG AGCAATCTGC TCATGAGTGA GGCCGATGGC GTCCTTTGCT

3130 3140 3150 3160 3170 3180  
CGGAAGAGTA TGAAGATGAA CAAAGCCCTG AAAAGATTAT CGAGCTGTAT GCGGAGTGCA

3190 3200 3210 3220 3230 3240  
TCAGGCTCTT TCACTCCATC GACATATCGG ATTGTCCCTA TACGAATAGC TTAGACAGCC

3250 3260 3270 3280 3290 3300  
GCTTAGCCGA ATTGGATTAC TTACTIONAATA ACGATCTGGC CGATGTGGAT TGCGAAAACT

3310 3320 3330 3340 3350 3360  
GGGAAGAAGA CACTCCATTT AAAGATCCGC GCGAGCTGTA TGATTTTTTA AAGACGAAA

3370 3380 3390 3400 3410 3420  
AGCCCGAAGA GGAACCTGTC TTTTCCCACG GCGACCTGGG AGACAGCAAC ATCTTTGTGA

3430 3440 3450 3460 3470 3480  
AAGATGGCAA AGTAAGTGGC TTTATTGATC TTGGGAGAAG CGGCAGGGCG GACAAGTGGT

3490 3500 3510 3520 3530 3540  
ATGACATTGC CTTCTGCGTC CGGTTCGATCA GGGAGGATAT CGGGGAAGAA CAGTATGTCG

3550 3560 3570 3580 3590 3600  
AGCTATTTTT TGACTIONACTG GGGATCAAGC CTGATTGGGA GAAAATAAAA TATTATATTT

3610 3620 3630 3640 3650 3660  
TACTGGATGA ATTGTTTTAG TACCTAGAAT GCATGACCAA AATCCCTTAA CGTGAGTTTT

3670        3680        3690        3700        3710        3720  
 CGTTCCACTG AGCGTCAGAC CCCGTAGAAA AGATCAAAGG ATCTTCTTGA GATCCTTTTT

3730        3740        3750        3760        3770        3780  
 TTCTGCGCGT AATCTGCTGC TTGCAAACAA AAAAACCACC GCTACCAGCG GTGGTTTGTT

3790        3800        3810        3820        3830        3840  
 TGCCGGATCA AGAGCTACCA ACTCTTTTTTC CGAAGGTAAC TGGCTTCAGC AGAGCGCAGA

3850        3860        3870        3880        3890        3900  
 TACCAAATAC TGTCTTCTA GTGTAGCCGT AGTTAGGCCA CCACTTCAAG AACTCTGTAG

3910        3920        3930        3940        3950        3960  
 CACCGCCTAC ATACCTCGCT CTGCTAATCC TGTACCAGT GGCTGCTGCC AGTGGCGATA

3970        3980        3990        4000        4010        4020  
 AGTCGTGTCT TACCGGGTTG GACTCAAGAC GATAGTTACC GGATAAGGCG CAGCGGTGG

4030        4040        4050        4060        4070        4080  
 GCTGAACGGG GGGTTCGTGC ACACAGCCCA GCTTGGAGCG AACGACCTAC ACCGAACTGA

4090        4100        4110        4120        4130        4140  
 GATACCTACA GCGTGAGCTA TGAGAAAGCG CCACGCTTCC CGAAGGGAGA AAGGCGGACA

4150        4160        4170        4180        4190        4200  
 GGTATCCGGT AAGCGGCAGG GTCGGAACAG GAGAGCGCAC GAGGGAGCTT CCAGGGGGAA

4210        4220        4230        4240        4250        4260  
 ACGCCTGGTA TCTTTATAGT CCTGTCGGGT TTCGCCACCT CTGACTTGAG CGTCGATTTT

4270        4280        4290        4300        4310        4320  
 TGTGATGCTC GTCAGGGGGG CGGAGCCTAT GGAAAAACGC CAGCAACGCG GCCTTTTTAC

4330        4340        4350        4360        4370        4380  
 GGTTCCCTGGC CTTTTGCTGG CTTTTGCTC ACATGTTCTT TCCTGCGTTA TCCCCTGATT

4390        4400        4410        4420        4430        4440  
 CTGTGGATAA CCGTATTACC GCCTTTGAGT GAGCTGATAC CGCTCGCCGC AGCCGAACGA

4450        4460        4470        4480        4490        4500  
 CCGAGCGCAG CGAGTCAGTG AGCGAGGAAG CGGAAGAGCG CCTGATGCGG TATTTTCTCC

4510        4520        4530        4540        4550        4560  
 TTACGCATCT GTGCGGTATT TCACACCGCA TATGGTGCAC TCTCAGTACA ATCTGCTCTG

4570        4580        4590        4600        4610        4620  
 ATGCCGCATA GTTAAGCCAG TATACACTCC GCTATCGCTA CGTGACTGGG TCATGGCTGC

4630 4640 4650 4660 4670 4680  
GCCCCGACAC CCGCCAACAC CCGCTGACGC GCCCTGACGG GCTTGTCTGC TCCC GGATC

4690 4700 4710 4720 4730 4740  
CGCTTACAGA CAAGCTGTGA CCGTCTCCGG GAGCTGCATG TGTCAGAGGT TTTCACCGTC

4750 4760 4770 4780 4790 4800  
ATCACCGAAA CGCGCGAGGC AGGGTGCCTT GATGTGGGCG CCGGCGGTCTG AGTGGCGACG

4810 4820 4830 4840 4850 4860  
GCGCGGCTTG TCCGCGCCTT GGTAGATTGC CTGGCCGTAG GCCAGCCATT TTTGAGCGGC

4870 4880 4890 4900 4910 4920  
CAGCGGCCGC GATAGGCCGA CGCGAAGCGG CGGGCGTAG GGAGCGCAGC GACCGAAGGG

4930 4940 4950 4960 4970 4980  
TAGGCGCTTT TTGCAGTCT TCGGCTGTGC GCTGGCCAGA CAGTTATGCA CAGGCCAGGC

4990 5000 5010 5020 5030 5040  
GGGTTTTAAG AGTTTTAATA AGTTTTAAAG AGTTTTAGGC GGAAAAATCG CCTTTTTTCT

5050 5060 5070 5080 5090 5100  
CTTTTATATC AGTCACTTAC ATGTGTGACC GGTTCCCAAT GTACGGCTTT GGGTTCCTAA

5110 5120 5130 5140 5150 5160  
TGTACGGGTT CCGGTTCCCA ATGTACGGCT TTGGGTTCCC AATGTACGTG CTATCCACAG

5170 5180 5190 5200 5210 5220  
GAAAGAGACC TTTTCGACCT TTTTCCCCTG CTAGGGCAAT TTGCCCTAGC ATCTGCTCCG

5230 5240 5250 5260 5270 5280  
TACATTAGGA ACCGGCGGAT GCTTCGCCCT CGATCAGGTT GCGGTAGCGC ATGACTAGGA

5290 5300 5310 5320 5330 5340  
TCGGGCCAGC CTGCCCCGCC TCCTCCTTCA AATCGTACTC CGGCAGGTCA TTTGACCCGA

5350 5360 5370 5380 5390 5400  
TCAGCTTGC CACGGTGAAG CAGAATTCT TGAATCTCC GGCCTGCCA CTGCGTTCGT

5410 5420 5430 5440 5450 5460  
AGATCGTCTT GAACAACCAT CTGGCTTCTG CCTTGCCTGC GGCAGGCGT GCCAGGCGT

5470 5480 5490 5500 5510 5520  
AGAGAAAACG GCCGATGCCG GGATCGATCA AAAAGTAATC GGGGTGAACC GTCAGCACGT

5530 5540 5550 5560 5570 5580  
CCGGTTCTT GCCTTCTGTG ATCTCGCGGT ACATCCAATC AGCTAGCTCG ATCTCGATGT

5590 5600 5610 5620 5630 5640  
ACTCCGGCCG CCCGGTTTCG CTCTTTACGA TCTTGTAGCG GCTAATCAAG GCTTCACCT

5650 5660 5670 5680 5690 5700  
CGGATACCGT CACCAGGCGG CCGTTCTTGG CCTTCTTCGT ACGCTGCATG GCAACGTGCG

5710 5720 5730 5740 5750 5760  
TGGTGTITAA CCGAATGCAG GTTTCTACCA GGTGCTCTTT CTGCTTTCCG CCATCGGCTC

5770 5780 5790 5800 5810 5820  
GCCGGCAGAA CTTGAGTACG TCCGCAACGT GTGGACGGAA CACGCGGCCG GGCTTGTCTC

5830 5840 5850 5860 5870 5880  
CCTTCCCTTC CCGGTATCGG TTCATGGATT CGGTTAGATG GGAAACCGCC ATCAGTACCA

5890 5900 5910 5920 5930 5940  
GGTCGTAATC CCACACACTG GCCATGCCGG CCGGCCCTGC GGAAACCTCT ACGTGCCCGT

5950 5960 5970 5980 5990 6000  
CTGGAAGCTC GTAGCGGATC ACCTCGCCAG CTCGTCGGTC ACGCTTCGAC AGACGGAAAA

6010 6020 6030 6040 6050 6060  
CGGCCACGTC CATGATGCTG CCACTATCGC GGGTGCCAC GTCATAGAGC ATCGGAACGA

6070 6080 6090 6100 6110 6120  
AAAAATCTGG TTGCTCGTCG CCCTTGGGCG GCTTCTAAT CGACGCGCA CCGGCTGCCG

6130 6140 6150 6160 6170 6180  
GCGGTTGCCG GGATTCTTTG CGGATTGAT CAGCGGCCGC TTGCCAGGAT TCACCGGGC

6190 6200 6210 6220 6230 6240  
GTGCTTCTGC CTCGATGCGT TGCCGCTGGG CGGCCTGCGC GGCCTCAAC TTCTCACCA

6250 6260 6270 6280 6290 6300  
GGTCATCACC CAGCGCCGCG CCGATTTGTA CCGGGCCGGA TGGTTTGC GA CCGTCACGCC

6310 6320 6330 6340 6350 6360  
GATTCCTCGG GCTTGGGGT TCCAGTGCCA TTGCAGGGCC GGCAGACAAC CCAGCCGCTT

6370 6380 6390 6400 6410 6420  
ACGCCTGGCC AACCGCCGT TCCTCCACAC ATGGGGCATT CCACGCGTC GGTGCCTGGT

6430 6440 6450 6460 6470 6480  
TGTTCTTGAT TTTCCATGCC GCCTCCTTA GCCGCTAAAA TTCATCTACT CATTATTCA

6490 6500 6510 6520 6530 6540  
TTTGCTCATT TACTCTGGTA GCTGCGCAT GTATTCAGAT AGCAGCTCGG TAATGGTCTT



6550 6560 6570 6580 6590 6600  
GCCTTGGCGT ACCGCGTACA TCTTCAGCTT GGTGTGATCC TCCGCCGGCA ACTGAAAGTT

6610 6620 6630 6640 6650 6660  
GACCCGCTTC ATGGCTGGCG TGTCTGCCAG GCTGGCCAAC GTTGCAGCCT TGCTGCTGCG

6670 6680 6690 6700 6710 6720  
TGCGCTCGGA CGGCCGGCAC TTAGCGTGTT TGTGCTTTTG CTCATTTTCT CTTTACCTCA

6730 6740 6750 6760 6770 6780  
TTAACTCAAA TGAGTTTTGA TTTAATTTCA GCGGCCAGCG CCTGGACCTC GCGGGCAGCG

6790 6800 6810 6820 6830 6840  
TCGCCCTCGG GTTCTGATTC AAGAACGGTT GTGCCGGCGG CGGCAGTGCC TGGGTAGCTC

6850 6860 6870 6880 6890 6900  
ACGCGCTGCG TGATACGGGA CTCAAGAATG GGCAGCTCGT ACCCGGCCAG CGCCTCGGCA

6910 6920 6930 6940 6950 6960  
ACCTCACCGC CGATGCGCGT GCCTTTGATC GCCCGCGACA CGACAAAGGC CGCTTGTAGC

6970 6980 6990 7000 7010 7020  
CTTCCATCCG TGACCTCAAT GCGCTGCTTA ACCAGCTCCA CCAGGTCGGC GGTGGCCCAT

7030 7040 7050 7060 7070 7080  
ATGTCGTAAG GGCTTGGCTG CACCGGAATC AGCACGAAGT CGGCTGCCTT GATCGCGGAC

7090 7100 7110 7120 7130 7140  
ACAGCCAAGT CCGCCGCCTG GGGCGCTCCG TCGATCACTA CGAAGTCGCG CCGGCCGATG

7150 7160 7170 7180 7190 7200  
GCCTTACAGT CGCGGTCAAT CGTCGGGCGG TCGATGCCGA CAACGGTTAG CGGTTGATCT

7210 7220 7230 7240 7250 7260  
TCCCGCACGG CCGCCCAATC GCGGGCACTG CCCTGGGGAT CGGAATCGAC TAACAGAACA

7270 7280 7290 7300 7310 7320  
TCGGCCCCGG CGAGTTGCAG GCGCGGGCT AGATGGGTTG CGATGGTCGT CTTGCCTGAC

7330 7340 7350 7360 7370 7380  
CCGCCTTTCT GGTTAAGTAC AGCGATAACC TTCATGCGTT CCCCTTGCCT ATTTGTTTAT

7390 7400 7410 7420 7430 7440  
TTACTCATCG CATCATATAC GCAGCGACCG CATGACGCAA GCTGTTTTAC TCAAATACAC

7450 7460 7470 7480 7490 7500  
ATCACCTTTT TAGACGGCGG CGCTCGGTTT CTTACGCGGC CAAGCTGGCC GGCCAGGCCG

7510 7520 7530 7540 7550 7560  
CCAGCTTGGC ATCAGACAAA CCGGCCAGGA TTTCATGCAG CCGCACGGTT GAGACGTGCG

7570 7580 7590 7600 7610 7620  
CGGGCGGCTC GAACACGTAC CCGGCCGCGA TCATCTCCGC CTCGATCTCT TCGGTAATGA

7630 7640 7650 7660 7670 7680  
AAAACGGTTC GTCCTGGCCG TCCTGGTGCG GTTTCATGCT TGTCCTCTT GGC GTT CATT

7690 7700 7710 7720 7730 7740  
CTCGGCGGCC GCCAGGGCGT CGGCCTCGGT CAATGCGTCC TCACGGAAGG CACCGCGCCG

7750 7760 7770 7780 7790 7800  
CCTGGCCTCG GTGGGCGTCA CTTCTCGCT GCGCTCAAGT GCGCGGTACA GGGTCGAGCG

7810 7820 7830 7840 7850 7860  
ATGCACGCCA AGCAGTGCAG CCGCCTCTTT CACGGTGCGG CCTTCCTGGT CGATCAGCTC

7870 7880 7890 7900 7910 7920  
GCGGGCGTGC GCGATCTGTG CCGGGGTGAG GGTAGGGCGG GGGCCAAACT TCACGCCTCG

7930 7940 7950 7960 7970 7980  
GGCCTTGGCG GCCTCGCGCC CGTCCGGGT GCGGTCGATG ATTAGGGAAC GCTCGAACTC

7990 8000 8010 8020 8030 8040  
GGCAATGCCG GCGAACACGG TCAACACCAT GCGGCCGGCC GGC GTG GTG TGTCGGCCCA

8050 8060 8070 8080 8090 8100  
CGGCTCTGCC AGGCTACGCA GGCCCGCGCC GGCCTCCTGG ATGCGCTCGG CAATGTCCAG

8110 8120 8130 8140 8150 8160  
TAGGTGCGGG GTGCTGCGGG CCAGGCGGTC TAGCCTGGTC ACTGTCACAA CGTCGCCAGG

8170 8180 8190 8200 8210 8220  
GCGTAGGTGG TCAAGCATCC TGGCCAGCTC CGGGCGGTGC CGCCTGGTGC CCGTATCTT

8230 8240 8250 8260 8270 8280  
CTCGAAAAC AGCTTGGTGC AGCCGGCCGC GTGCAGTTCG GCCCGTTGGT TGGTCAAGTC

8290 8300 8310 8320 8330 8340  
CTGGTCGTCG GTGCTGACGC GGGCATAGCC CAGCAGGCCA GCGGCGCGC TCTTGTTCAT

8350 8360 8370 8380 8390 8400  
GGCGTAATGT CTCCGGTTCT AGTCGCAAGT ATTCTACTTT ATGCGACTAA AACACGCGAC

8410 8420 8430 8440 8450 8460  
AAGAAAACGC CAGGAAAAGG GCAGGGCGGC AGCCTGTCGC GTA ACTTAGG ACTTGTGCGA

8470 8480 8490 8500 8510 8520  
CATGTCGTTT TCAGAAGACG GCTGCACTGA ACGTCAGAAG CCGACTGCAC TATAGCAGCG

8530 8540 8550 8560 8570 8580  
GAGGGGTTGG ATCAAAGTAC TTTGATCCCG AGGGGAACCC TGTGGTTGGC ATGCACATAC

8590 8600 8610 8620 8630 8640  
AAATGGACGA ACGGATAAAC CTTTTACGCG CCTTTTAAAT ATCCGTTATT CTAATAAACG

8650 8660 8670 8680 8690 8700  
CTCTTTTCTC TTAGGTTTAC CCGCCAATAT ATCCTGTCAA ACACTGATAG TTTAACTGA

8710 8720 8730 8740 8750 8760  
AGGCGGGAAA CGACAATCTG ATCCAAGCTC AAGCTGCTCT AGCATTGCC ATTACAGCTG

8770 8780 8790 8800 8810 8820  
CGCAACTGTT GGAAGGGCG ATCGGTGCGG GCCTCTTCGC TATTACGCCA GCTGGCGAAA

8830 8840 8850 8860 8870 8880  
GGGGGATGTG CTGCAAGGCG ATTAAGTTGG GTAAGCCAG GGTTCCTCCA GTCACGACGT

8890 8900 8910 8920 8930 8940  
TGTA AACGA CGCCAGTGC CAAGCTTGCA TGGATCTTC AACACCTGT GCTAGCTACT

8950 8960 8970 8980 8990 9000  
CCACTGCTCC ATAGGCAATC ATCAATCAGT AATCCGTTCT GAAAAGAAGA TATAGGTGTG

9010 9020 9030 9040 9050 9060  
CGCAATCAGG AACGTTCTAG TTCGTGCTAG AAATCAGCAG CTCCTAAGTT AGCATCTCGA

9070 9080 9090 9100 9110 9120  
TGAAC TAAA TGCTCGCTGC GGGCGTCCGG CGGAGATGAA GTTTGTGATA AACTTGGTCA

9130 9140 9150 9160 9170 9180  
TGACATTCAT ATATGTGCTT GGTGTACGGA GTAGTTCATC AGCAAACATA CACCTACTTC

9190 9200 9210 9220 9230 9240  
TACCTTATCC ATTTGGATTG CTCATGGCGG CTTTGATATG GAATTTGTAA TGAAC TTGGT

9250 9260 9270 9280 9290 9300  
TATGACTTAT GACATACTGA TACTCGTAAC ATTCATAGAT ACTGACATAA ATTCATCAAC

9310 9320 9330 9340 9350 9360  
TACAATAGAT GAGATGGCTA GTCTTAGTAG AACAGTAGTC TCTCTTCCG GCTTGCTCCA

9370 9380 9390 9400 9410 9420  
TTGGCTGATG ACGATGAACA ACTCGGACTC ATTGATTCCA GCATTATCTG ATTCTCGCAT

9430 9440 9450 9460 9470 9480  
TTCGAGGTCC GGATTAGGGT CTCACCGAGA TGTGGATAGA ATTGCCATGT CAGGAATTGA

9490 9500 9510 9520 9530 9540  
AGGAGGACGA GCCATATGTG CATATACATG ACGGGAGATC AAGCGGCCAG TCAAGAGGCT

9550 9560 9570 9580 9590 9600  
AACTGCAACC CTATTATATA CGATCAGCCT GCTAGAACAC GTAGCACTGT CTTTTTTGTC

9610 9620 9630 9640 9650 9660  
TGAACTCTGA AGATGAAAGG TTCAGAGAAA TGGCTCGCCT TATCCAAGCC GGCGATGGAT

9670 9680 9690 9700 9710 9720  
GGAGGAGGAG GTAGCCGGCG CCCGCCTCAG GCAGTCGTCTG CGATCACGCC GCCGCATCCC

9730 9740 9750 9760 9770 9780  
GTCGCCTTGG AGACCGGGCC CCGACGCGGC CGACGCGGCG CCTACGTGGC CATGCTTTAT

9790 9800 9810 9820 9830 9840  
TGCCTTATCC ATATCCACGC CATTTATTGT GGTCTCTCTCT CCTGATCATT CTCATTCCCC

9850 9860 9870 9880 9890 9900  
TGCCACGGTG ACCGTGCCCC CGGTGTTCTA TATATGCCCC CCGACGTCGA GGTCATTGCG

9910 9920 9930 9940 9950 9960  
CACGAACACA TCGATCATCC ATCATCTACA AGAGATCGTC TAGAATTATT ACATCAAAC

9970 9980 9990 10000 10010 10020  
AAAAGATGAA GAATACCAGC TCGTTGTGTT TGCTTCTCCT CGTGGTGCTT TGCTCACTAA

10030 10040 10050 10060 10070 10080  
CATGCAATTC GGGACAAGCA AATTCCGATT CCGAGTGTCC GCTCAGCCAC GACGGATACT

10090 10100 10110 10120 10130 10140  
GCCTCCATGA TGGGGTCTGC ATGTACATTG AGGCCCTGGA CAAGTACGCG TGTAAGTGG

10150 10160 10170 10180 10190 10200  
TGGTTGGCTA TATCGGCGAA AGGTGCCAGT ATCGGGACTT GAAGTGGTGG GAGCTTCGCT

10210 10220 10230 10240 10250 10260  
GATAGGTACC GAGCTCGGGC TCAAGCCCTA AACTGAACGG GATAGTCATG CTCAAACCAG

10270 10280 10290 10300 10310 10320  
TTTCTACACG GCAAGAATTT ACTGATTCTT ATACTTTTGC AGTCAATTAA ATTATGGTTT

10330 10340 10350 10360 10370 10380  
TTATATATGT AATTTTGTAT CCGATTGTAG CGTTCGAATA AGTAGGCAGG CTCTCTAGCC

```
10390      10400      10410      10420      10430      10440
TCTAGGTTAA TTGCGGGGCA TATGTAGCTT GCCAGTTAAT TGTGTTTGTA TCACGCAGTT

10450      10460      10470      10480      10490      10500
TGTAACCGTT GGTGCAATAT ATAATGTCAG GTTCAGGATG CAGTAAAAAA TCATACTGCA

10510      10520      10530      10540      10550      10560
CCGATCAGTG AGTTTTTATG AATTC..... .....
```

**Supplementary Fig. 1.** pJKS131 vector sequence to transfer the *EGF* to the rice genome.
